# Supplementary material for: Evaluation of 18 satellite- and model-based soil moisture products using in situ measurements from 826 sensors
Source: Copernicus journal article supplement (doi:10.5194/hess-2020-184), 2020-05-19
Supplement: Supplementary file 1 [file hess-2020-184-supplement.pdf]

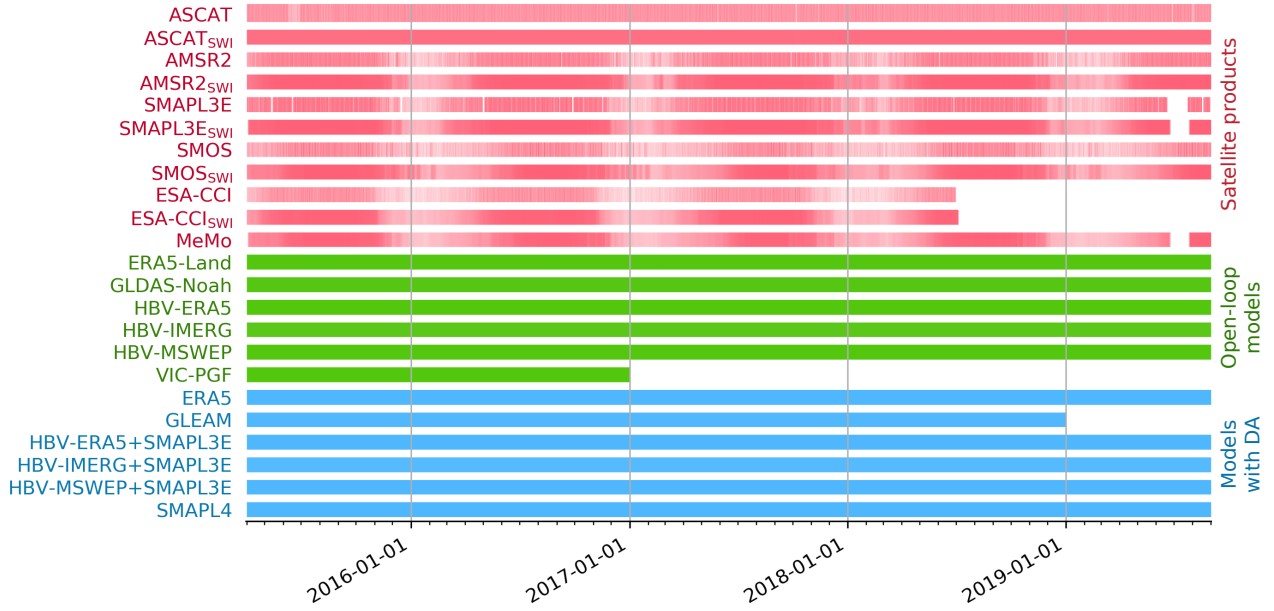

Figure S1: For each product, the daily % of probes ( $N = 869$ ) with  $\geq 1$  soil moisture estimate, before masking the data based on soil temperature and snow depth. White indicates that there are no soil moisture estimates for any of the probes. The  $x$ -axis spans the evaluation period (March 31, 2015, to September 16, 2019).

Table S1: The calibrated parameter set used for the HBV simulations. We only calibrated the 7 parameters pertaining to the snow and soil routines and thus relevant for simulating soil moisture.

| Parameter | Description                                                                          | Calibration range | Calibrated value |
|-----------|--------------------------------------------------------------------------------------|-------------------|------------------|
| BETA      | Shape coefficient of recharge function (—)                                           | 1 to 6            | 5.37             |
| FC        | Maximum soil moisture storage (mm)                                                   | 50 to 1000        | 145.48           |
| LP        | Soil moisture value above which actual evaporation reaches potential evaporation (—) | 0.2 to 1          | 0.79             |
| TT        | Threshold temperature ( $^{\circ}\text{C}$ )                                         | —5 to 5           | —0.58            |
| CFMAX     | Degree-day factor ( $\text{mm } ^{\circ}\text{C}^{-1} \text{ d}^{-1}$ )              | 0.5 to 10         | 1.12             |
| CFR       | Refreezing coefficient (—)                                                           | 0 to 0.1          | 0.09             |
| CWH       | Water holding capacity (—)                                                           | 0 to 0.2          | 0.09             |

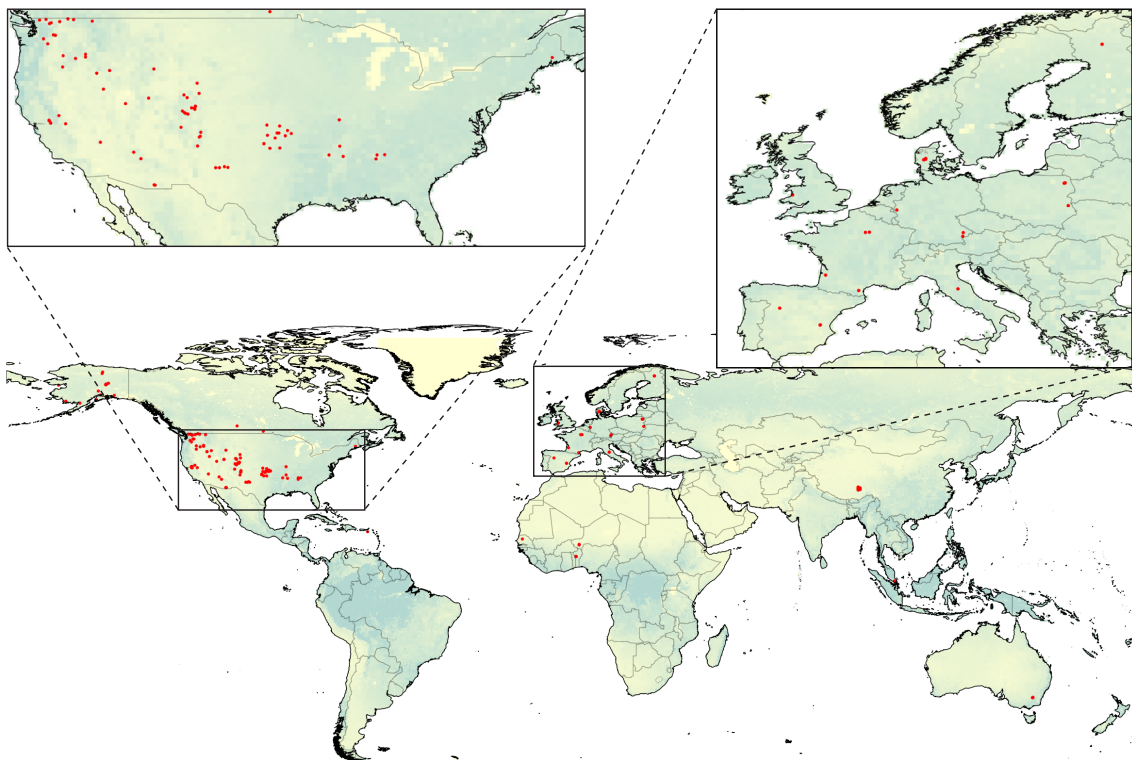

Figure S2: Location of the 177 independent probes used for the calibration of the HBV model.
